# Supplementary material
Source: PubMed Central journal article supplement (PMC10344608)
Supplement: NIHMS1908946-supplement-1.pdf [file NIHMS1908946-supplement-1.pdf]

434  
 435  
 436  
 437  
 438

| Overall, N = 155                  | On day 1 of illness |             |                      |      | Reported during Initial Visit |             |                      |      |
|-----------------------------------|---------------------|-------------|----------------------|------|-------------------------------|-------------|----------------------|------|
|                                   | Total, N = 154      | PWH, N = 72 | HIV negative, N = 82 | SMD  | Total N = 154                 | PWH, N = 72 | HIV Negative, N = 82 | SMD  |
| <b>Skin lesions</b>               | 62 (40%)            | 32 (44%)    | 30 (37%)             | 0.16 | 142 (92%)                     | 68 (93%)    | 75 (91%)             | 0.06 |
| <b>Fever</b>                      | 51 (33%)            | 29 (40%)    | 22 (27%)             | 0.29 | 96 (62%)                      | 47 (64%)    | 49 (60%)             | 0.11 |
| <b>Sore throat</b>                | 11 (7.1%)           | 4 (5.6%)    | 7 (8.5%)             | 0.12 | 18 (12%)                      | 6 (8.2%)    | 12 (15%)             | 0.20 |
| <b>Myalgias</b>                   | 19 (12%)            | 8 (11%)     | 11 (13%)             | 0.07 | 42 (27%)                      | 15 (21%)    | 27 (33%)             | 0.28 |
| <b>Headache</b>                   | 11 (7.1%)           | 4 (5.6%)    | 7 (8.5%)             | 0.12 | 26 (17%)                      | 8 (11%)     | 18 (22%)             | 0.30 |
| <b>Ocular symptom</b>             | 0 (0%)              | 0 (0%)      | 0 (0%)               | -    | 6 (3.9%)                      | 2 (2.7%)    | 4 (4.9%)             | 0.11 |
| <b>Fatigue/malaise</b>            | 29 (19%)            | 13 (18%)    | 15 (18%)             | 0.01 | 56 (36%)                      | 28 (38%)    | 29 (35%)             | 0.04 |
| <b>Oral pain</b>                  | 2 (1.3%)            | 2 (2.8%)    | 0 (0%)               | 0.24 | 9 (5.8%)                      | 5 (6.8%)    | 4 (4.9%)             | 0.09 |
| <b>Odynophagia</b>                | 0 (0%)              | 0 (0%)      | 0 (0%)               | -    | 6 (3.9%)                      | 2 (2.7%)    | 4 (4.9%)             | 0.11 |
| <b>Nausea/Vomiting</b>            | 1 (0.6%)            | 1 (1.4%)    | 0 (0%)               | 0.17 | 9 (5.8%)                      | 4 (5.5%)    | 5 (6.1%)             | 0.02 |
| <b>Diarrhea</b>                   | 3 (1.9%)            | 2 (2.8%)    | 1 (1.2%)             | 0.11 | 12 (7.8%)                     | 8 (11%)     | 5 (6.1%)             | 0.13 |
| <b>Rectal pain</b>                | 20 (13%)            | 8 (11%)     | 12 (15%)             | 0.11 | 82 (53%)                      | 34 (47%)    | 49 (60%)             | 0.28 |
| <b>Anal bleeding or discharge</b> | 8 (5.2%)            | 7 (9.7%)    | 1 (1.2%)             | 0.38 | 44 (29%)                      | 20 (27%)    | 25 (30%)             | 0.09 |
| <b>Dysuria</b>                    | 1 (0.6%)            | 1 (1.4%)    | 0 (0%)               | 0.17 | 16 (10%)                      | 4 (5.5%)    | 12 (15%)             | 0.30 |
| <b>Urethral discharge</b>         | 1 (0.6%)            | 1 (1.4%)    | 0 (0%)               | 0.17 | 3 (1.9%)                      | 2 (2.7%)    | 1 (1.2%)             | 0.11 |
| <b>Dizziness</b>                  | 0 (0%)              | 0 (0%)      | 0 (0%)               | -    | 2 (1.3%)                      | 0 (0%)      | 2 (2.4%)             | 0.22 |
| <b>Arthralgia</b>                 | 0 (0%)              | 0 (0%)      | 0 (0%)               | -    | 5 (3.2%)                      | 0 (0%)      | 5 (6.1%)             | 0.36 |
| <b>Lymphadenopathy</b>            | 11 (7.1%)           | 5 (6.9%)    | 6 (7.3%)             | 0.01 | 61 (40%)                      | 20 (27%)    | 41 (50%)             | 0.47 |
| <b>Cough/SOB</b>                  | 4 (2.6%)            | 1 (1.4%)    | 3 (3.7%)             | 0.15 | 10 (6.5%)                     | 4 (5.5%)    | 6 (7.3%)             | 0.07 |
| <b>Others</b>                     | 25 (16%)            | 7 (9.7%)    | 18 (22%)             | 0.34 | 65 (42%)                      | 28 (38%)    | 37 (45%)             | 0.13 |
| <b>None of the</b>                | 0 (0%)              | 0 (0%)      | 0 (0%)               | -    | 0 (0%)                        | 0 (0%)      | 0 (0%)               | -    |

above

439 **Supplemental table 1. Clinical presentation of mpox virus infection treated with tecovirimat;**  
 440 **symptoms**

441

|                                             | <b>Overall<br/>(N = 154)<br/>n, %</b> | <b>PWH<br/>(N = 72)<br/>n, %</b> | <b>HIV Negative<br/>(N= 82)<br/>n, %</b> | <b>Unadjusted SMD</b> |
|---------------------------------------------|---------------------------------------|----------------------------------|------------------------------------------|-----------------------|
| <b>Presence of Prodrôme (N=152)</b>         | 81 (53%)                              | 34 (49%)                         | 47 (57%)                                 | -0.15                 |
| <b>Number of Lesions (N = 151)</b>          |                                       |                                  |                                          |                       |
| <5                                          | 17 (11%)                              | 7 (10%)                          | 10 (12%)                                 | -0.07                 |
| 5-9                                         | 45 (30%)                              | 20 (29%)                         | 25 (30%)                                 | -0.03                 |
| 10-19                                       | 40 (26%)                              | 24 (35%)                         | 16 (20%)                                 | 0.35                  |
| 20-99                                       | 46 (30%)                              | 17 (25%)                         | 29 (35%)                                 | -0.24                 |
| >= 100                                      | 3 (2.0%)                              | 1 (1.4%)                         | 2 (2.4%)                                 | -0.07                 |
| <b>Exam Findings (N= 154)</b>               |                                       |                                  |                                          |                       |
| Lymphadenopathy                             | 42 (27%)                              | 9 (12%)                          | 33 (40%)                                 | -0.66                 |
| <b>Pharyngitis</b>                          | 5 (3.2%)                              | 0 (0%)                           | 5 (6.1%)                                 | -0.36                 |
| <b>Abdominal Tenderness</b>                 | 1 (0.6%)                              | 0 (0%)                           | 1 (1.2%)                                 | -0.16                 |
| <b>Testicular/penile swelling</b>           | 8 (5.2%)                              | 6 (8.3%)                         | 2 (2.4%)                                 | 0.26                  |
| <b>Penile Discharge</b>                     | 1 (0.6%)                              | 0 (0%)                           | 1 (1.2%)                                 | -0.16                 |
| <b>Perianal tenderness</b>                  | 6 (3.9%)                              | 3 (4.2%)                         | 3 (3.7%)                                 | 0.03                  |
| <b>Anal discharge or bleeding</b>           | 1 (0.6%)                              | 1 (1.4%)                         | 0 (0%)                                   | 0.17                  |
| No non-lesion abnormalities                 | 87 (56%)                              | 47 (65%)                         | 40 (49%)                                 | 0.34                  |
| <b>Co-occurring STI (N= 154)</b>            |                                       |                                  |                                          |                       |
| Any STI                                     | 48 (31%)                              | 27 (38%)                         | 21 (26%)                                 | 0.26                  |
| Syphilis                                    | 13 (8.4%)                             | 10 (14%)                         | 3 (3.7%)                                 | 0.37                  |
| <b>Presence of bacterial superinfection</b> | 51 (33%)                              | 22 (31%)                         | 29 (37%)                                 | -0.11                 |

442 **Supplemental Table 2: Clinical presentation of mpox virus infection treated with**  
 443 **tecovirimat; other findings**

444 STI: sexually transmitted infection

445
